# Supplementary material for: Clinoptilolite nanoparticles modified with dimethyl glyoxime as a sensitive modifier for a carbon paste electrode in the voltammetric determination of Ni(ii): experimental design by response surface methodology
Source: Royal Society of Chemistry journal article supplement (doi:10.1039/c7nj02833d), 2017-01-01
Supplement: c7nj02833d1.pdf [file c7nj02833d1.pdf]

**Supplementary materials:**

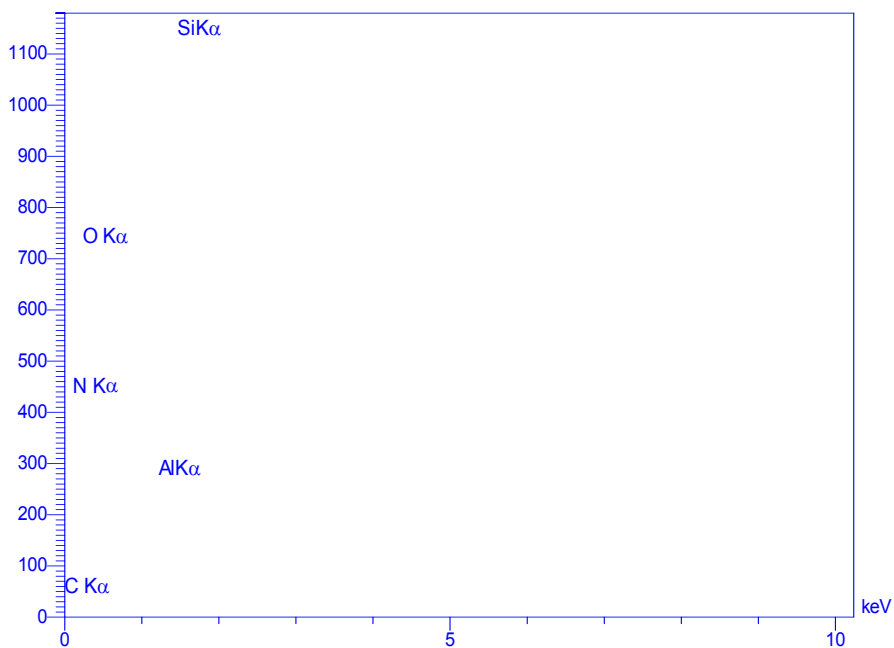

**SM1.** EDX spectrum of Cn-DMG sample.

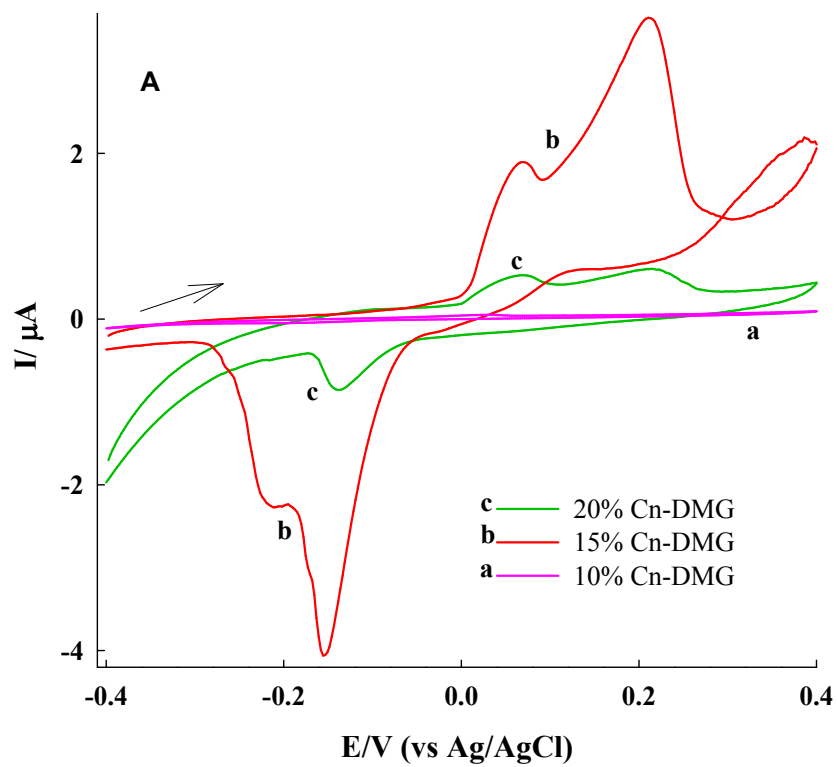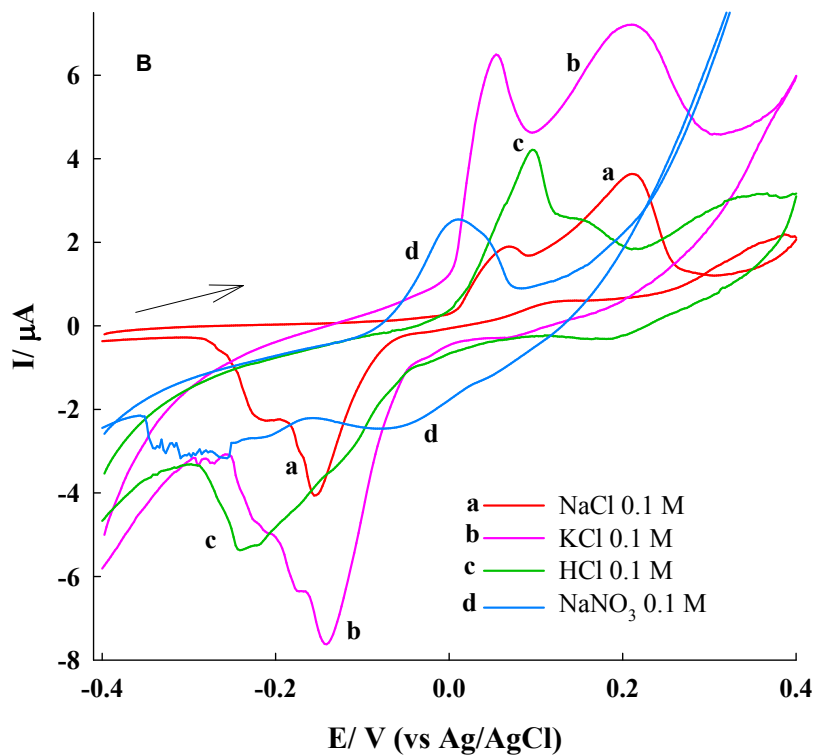

**SM2. A)** Effect of the modifier percentage on the voltammetric response of the modified Cn-DMG/CPE ( $0.1 \text{ mmol L}^{-1} \text{ NaCl} + 0.01 \text{ mmol L}^{-1} \text{ Ni(II)}$  (pH 5.5), scan rate:  $30 \text{ mV s}^{-1}$ ); **B)** Effect of supporting electrolyte on the CV response of the Cn-DMG/CPE electrode (15% modifier, scan rate of  $30 \text{ mV s}^{-1}$  in different electrolytes with concentration of 0.1 M (a) NaCl, (b) KCl, (c) HCl and (d)  $\text{NaNO}_3$  containing  $0.01 \text{ mol L}^{-1} \text{ Ni}^{+2}$  solution (pH=5.5)).

SM3. Suggested matrix by the model for the voltammetric determination of Ni(II) by the modified electrode.

| Std | Block | Run | A: pH | B : Scan rate | C: C <sub>DMG</sub> | D: Modifier% | Y (Ip: $\mu$ A) |
|-----|-------|-----|-------|---------------|---------------------|--------------|-----------------|
| 18  | 1     | 1   | 4.25  | 115           | 0.15                | 16           | 29.59           |
| 14  | 1     | 2   | 5.5   | 70            | 0.2                 | 19.5         | 18.713          |
| 2   | 1     | 3   | 5.5   | 70            | 0.1                 | 12.5         | 9.5328          |
| 5   | 1     | 4   | 3     | 70            | 0.2                 | 12.5         | 38.052          |
| 15  | 1     | 5   | 3     | 160           | 0.2                 | 19.5         | 37.665          |
| 9   | 1     | 6   | 3     | 70            | 0.1                 | 19.5         | 43.475          |
| 3   | 1     | 7   | 3     | 160           | 0.1                 | 12.5         | 29.3            |
| 17  | 1     | 8   | 4.25  | 115           | 0.15                | 16           | 20.335          |
| 8   | 1     | 9   | 5.5   | 160           | 0.2                 | 12.5         | 27.217          |
| 12  | 1     | 10  | 5.5   | 160           | 0.1                 | 19.5         | 86.546          |
| 6   | 2     | 11  | 5.5   | 70            | 0.2                 | 12.5         | 13.582          |
| 7   | 2     | 12  | 3     | 160           | 0.2                 | 12.5         | 26.518          |
| 19  | 2     | 13  | 4.25  | 115           | 0.15                | 16           | 8.8282          |
| 11  | 2     | 14  | 3     | 160           | 0.1                 | 19.5         | 16.418          |
| 10  | 2     | 15  | 5.5   | 70            | 0.1                 | 19.5         | 59.519          |
| 16  | 2     | 16  | 5.5   | 160           | 0.2                 | 19.5         | 15.046          |
| 20  | 2     | 17  | 4.25  | 115           | 0.15                | 16           | 5.7681          |
| 4   | 2     | 18  | 5.5   | 160           | 0.1                 | 12.5         | 20.944          |
| 1   | 2     | 19  | 3     | 70            | 0.1                 | 12.5         | 23.513          |
| 13  | 2     | 20  | 3     | 70            | 0.2                 | 19.5         | 9.1553          |
| 29  | 3     | 21  | 4.25  | 115           | 0.15                | 16           | 9.3027          |
| 23  | 3     | 22  | 4.25  | 25            | 0.15                | 16           | 2.0798          |
| 25  | 3     | 23  | 4.25  | 115           | 0.05                | 16           | 7.4171          |
| 27  | 3     | 24  | 4.25  | 115           | 0.15                | 9            | 26.02           |
| 24  | 3     | 25  | 4.25  | 205           | 0.15                | 16           | 28.206          |
| 22  | 3     | 26  | 6.75  | 115           | 0.15                | 16           | 25.946          |
| 30  | 3     | 27  | 4.25  | 115           | 0.15                | 16           | 17.815          |
| 28  | 3     | 28  | 4.25  | 115           | 0.15                | 23           | 15.943          |
| 21  | 3     | 29  | 1.75  | 115           | 0.15                | 16           | 28.134          |
| 26  | 3     | 30  | 4.25  | 115           | 0.25                | 16           | 5.0592          |
